# Supplementary material
Source: PubMed Central journal article supplement (PMC3997488)
Supplement: NIHMS4241-supplement-1.pdf [file NIHMS4241-supplement-1.pdf]

Supplementary material for

## **Kin28 regulates the transient association of mediator with core promoters**

Célia Jeronimo<sup>1</sup> and François Robert<sup>1,2</sup>

<sup>1</sup> Institut de recherches cliniques de Montréal, Montréal, Québec, Canada.

<sup>2</sup> Département de Médecine, Université de Montréal, Montréal, Québec, Canada.

Correspondence should be addressed to FR ([francois.robert@ircm.qc.ca](mailto:francois.robert@ircm.qc.ca))

**Supplementary Figure 1** Enrichment in highly transcribed coding regions is often observed in ChIP experiments and has to be controlled for.

**Supplementary Figure 2** A complement to Figure 1.

**Supplementary Figure 3** A complement to Figure 3.

**Supplementary Table 1** Yeast strains used in this study.

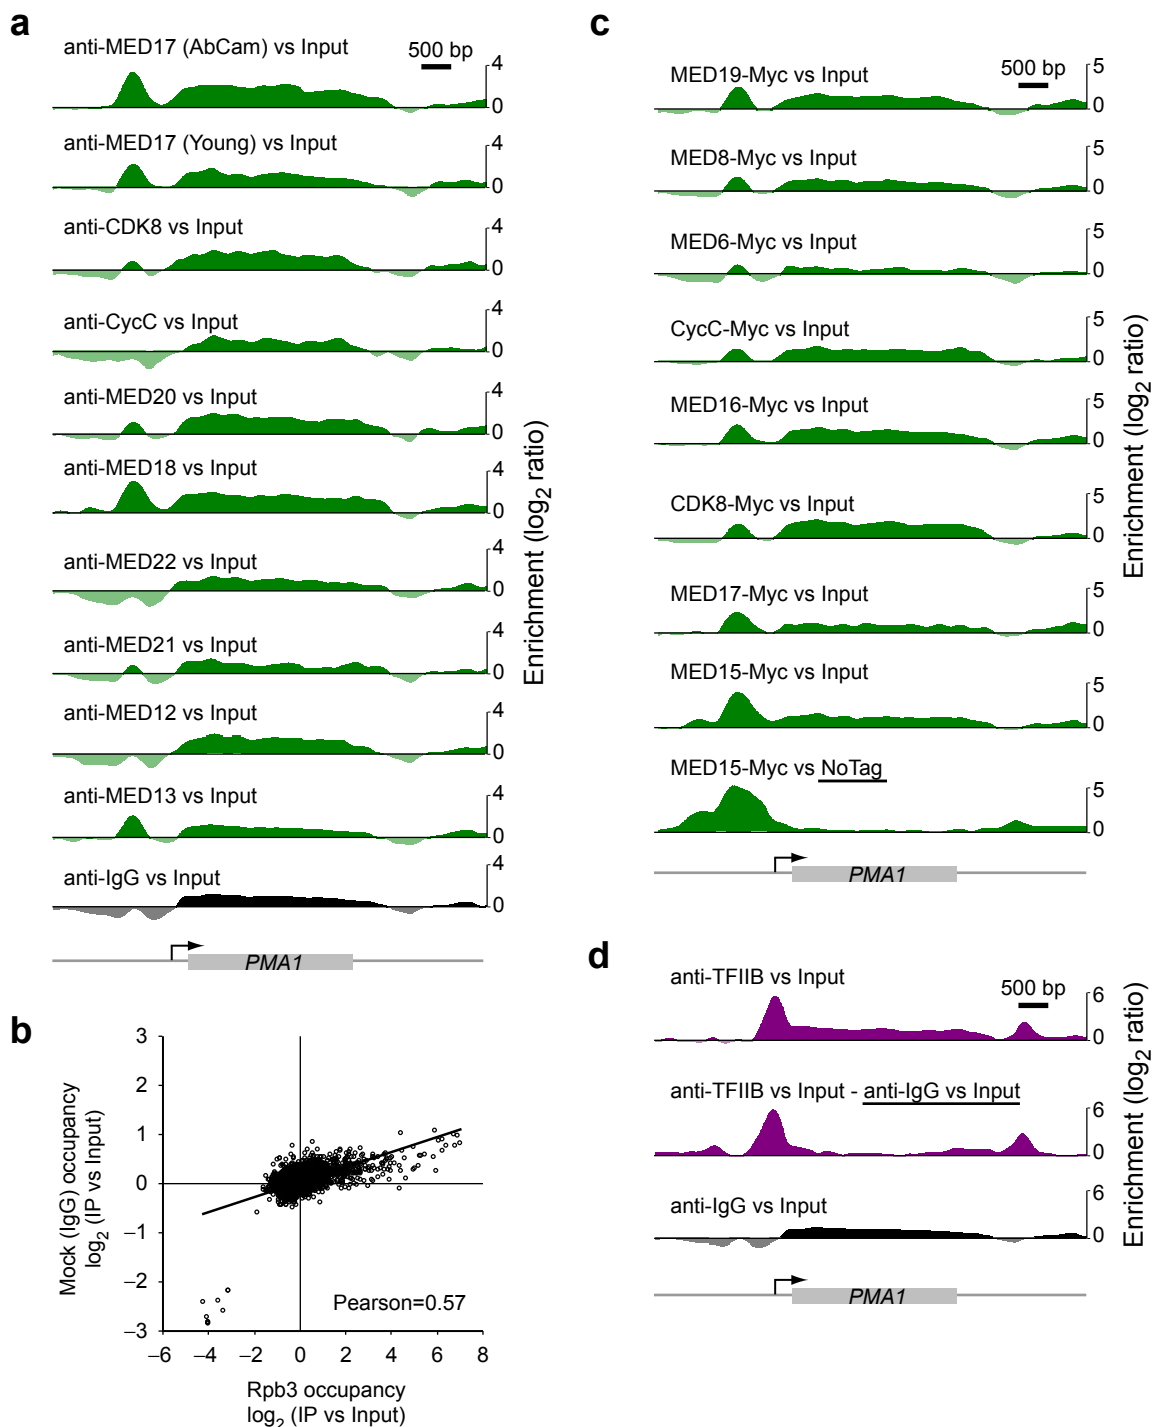

**Supplementary Figure 1** Enrichment in highly transcribed coding regions is often observed in ChIP experiments and has to be controlled for. **(a)** Enrichment of various Mediator subunits at the highly transcribed *PMA1* gene as determined by ChIP-chip using a panel of rabbit polyclonal antibodies (green), as well as using a control IgG antibody (black). All ChIPs were hybridized (and therefore normalized) against input DNA. **(b)** A scatter plot of the enrichment over coding regions in a control IgG ChIP and an Rpb3 ChIP. **(c)** Enrichment of various Mediator subunits as determined by ChIP-chip using epitope (Myc)-tagged Mediator subunits (green). Except for the last trace, all ChIPs were hybridized (and therefore normalized) against input DNA as in **a**. The last profile, however, shows an experiment where the MED15-Myc ChIP sample was hybridized (and therefore normalized) against a control ChIP sample performed using the same anti-Myc antibody but from an isogenic non-tagged strain. **(d)** TFIIIB enrichment as determined by ChIP-chip using a rabbit polyclonal anti-TFIIIB antibody (purple) as well as using a control IgG antibody (black) as in **a**. The middle panel shows TFIIIB enrichment after subtracting the signal from the control (black) experiment. Overall, these experiments show that ChIP experiments tend to enrich highly transcribed coding regions regardless of the antibody used. It also shows that most of this systematic error can be removed either by normalizing against controls ChIPs performed in a non-tagged strain (in the case where a tagged protein is tested) or against a control ChIP performed using IgG (when a polyclonal antibody is used). Because each antibody varies with regards to the amount of noise it generates, we favor, when possible, using the "tagged versus non-tagged" strategy.

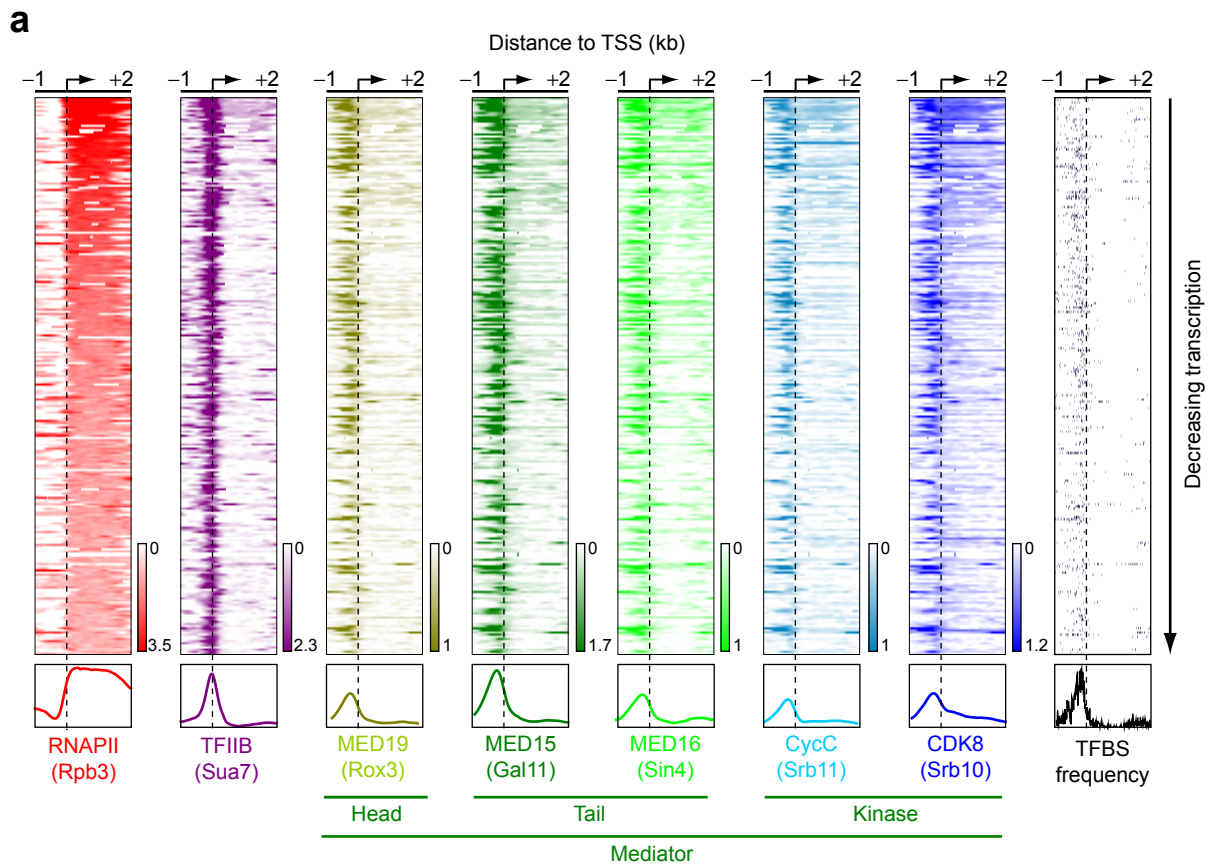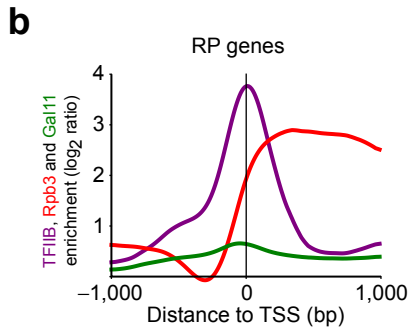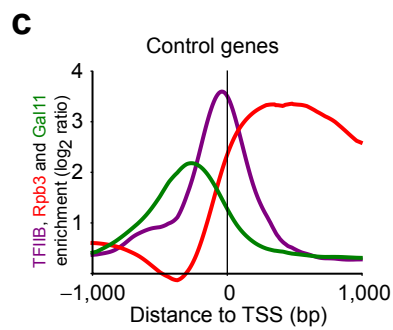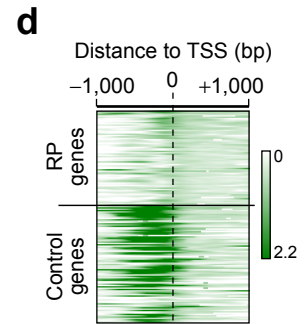

**Supplementary Figure 2** A complement to Figure 1. **(a)** A heat map representation of the data from Figure 1a. Genes were sorted by decreasing Rpb3 occupancy and the data were aligned on the TSS. **(b)** The average TFIIB (purple), RNAPII (Rpb3, red) and Mediator (Gal11, green) occupancies are shown around the TSS of RP genes. **(c)** Same as in **b** but for a group of control genes chosen based on the fact that they exhibit similar transcription rates as the RP genes from **b**. **(d)** A heat map representation of Mediator (Gal11) occupancy over the same genes as in **b** and **c**.

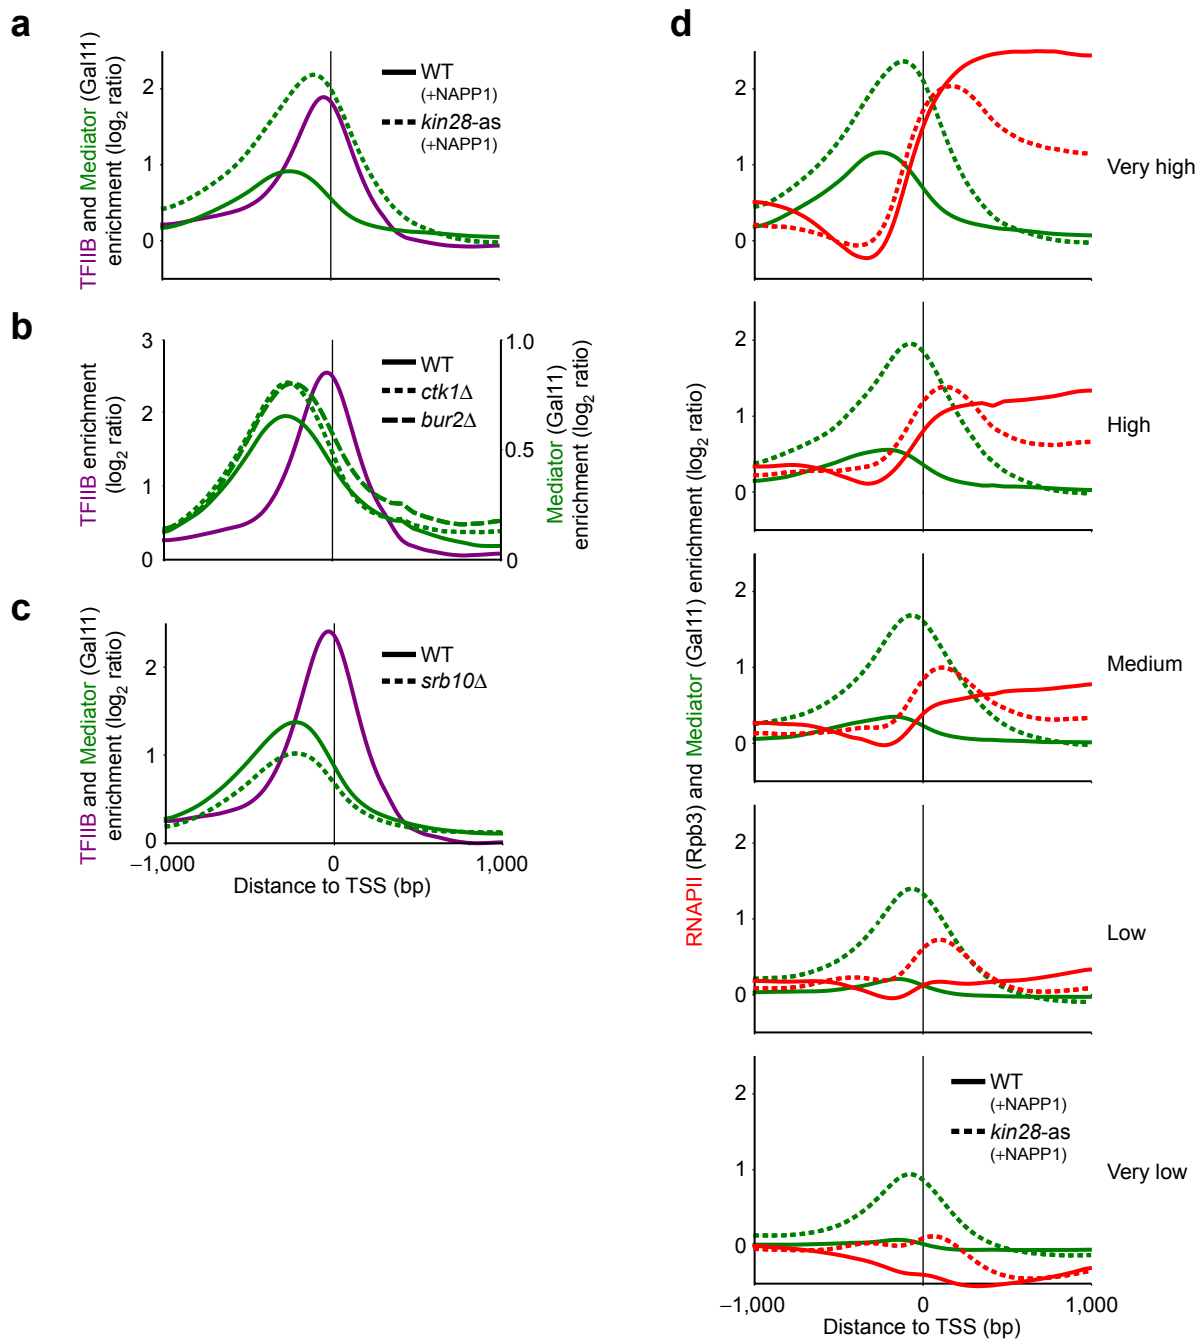

**Supplementary Figure 3** A complement to Figure 3. **(a-c)** Average Mediator (Gal11, green) occupancy in wild type (WT, solid traces) and the indicated CTD kinase mutants (dotted and dashed traces) around the TSS of all genes with an Rpb3 average ORF occupancy  $>1$  in WT cells. TFIIIB (purple) from WT cells is shown as a place-holder for core promoters. Data are shown for *kin28-as* mutant treated with NAPP1 ( $n=266$ ) **(a)**, *ctk1* $\Delta$  and *bur2* $\Delta$  mutants ( $n=299$ ) **(b)** and *srb10* $\Delta$  mutant ( $n=295$ ) **(c)**. **(d)** Average Mediator (Gal11, green) and RNAPII (Rpb3, red) occupancy in wild type (WT, solid traces) and *kin28-as* mutant (*kin28-as*, dotted traces) cells, both treated with NAPP1, around the TSS for groups of genes with different RNAPII occupancies. The genes were grouped based on the average Rpb3 enrichment ( $\log_2$  ratio) over their ORF ( $>1.5$ , Very high  $n=142$ ;  $1-1.5$ , High  $n=135$ ;  $0.5-1$ , Medium  $n=337$ ;  $0-0.5$ , Low  $n=827$ ;  $<0$ , Very low  $n=1764$ ).

**Supplementary Table 1** Yeast strains used in this study.

| Strain  | Alias   | Background | Genotype                                                                                                                                                                | Source           |
|---------|---------|------------|-------------------------------------------------------------------------------------------------------------------------------------------------------------------------|------------------|
| yFR116  | Z1256   | W303       | MATa ade2-1 trp1-1 can1-100 leu2-3,112 his3-11,15 ura3                                                                                                                  | REF <sup>1</sup> |
| yFR117  |         | S288C      | MATa his3Δ1 leu2Δ0 met15Δ0 ura3Δ0                                                                                                                                       | Open Bio.        |
| yFR119  |         | W303       | MATa ade2-1 trp1-1 can1-100 leu2-3,112 his3-11,15 ura3 ROX3-18MYC::kITRP1                                                                                               | This work        |
| yFR121  |         | W303       | MATa ade2-1 trp1-1 can1-100 leu2-3,112 his3-11,15 ura3 MED8-9MYC::kITRP1                                                                                                | This work        |
| yFR150  |         | W303       | MATa ade2-1 trp1-1 can1-100 leu2-3,112 his3-11,15 ura3 MED6-18MYC::kITRP1                                                                                               | This work        |
| yFR167  |         | W303       | MATa ade2-1 trp1-1 can1-100 leu2-3,112 his3-11,15 ura3 SRB11-9MYC::kITRP1                                                                                               | This work        |
| yFR169  |         | W303       | MATa ade2-1 trp1-1 can1-100 leu2-3,112 his3-11,15 ura3 SIN4-18MYC::kITRP1                                                                                               | This work        |
| yFR178  |         | W303       | MATa ade2-1 trp1-1 can1-100 leu2-3,112 his3-11,15 ura3 SRB10-9MYC::kITRP1                                                                                               | This work        |
| yFR399  | KLY091  | W303       | MATa ade2-1 trp1-1 can1-100 leu2-3,112 his3-11,15 ura3 GAL11-9MYC::TRP1                                                                                                 | REF <sup>2</sup> |
| yFR401  | KLY097  | W303       | MATa ade2-1 trp1-1 can1-100 leu2-3,112 his3-11,15 ura3 SRB4-9MYC::TRP1                                                                                                  | REF <sup>2</sup> |
| yFR551  |         | S288C      | MATa his3Δ1 leu2Δ0 met15Δ0 ura3Δ0 ctk1Δ::kanMX4                                                                                                                         | Open Bio.        |
| yFR682  |         | S288C      | MATa his3Δ1 leu2Δ0 met15Δ0 ura3D0 bur2Δ::kanMX4                                                                                                                         | Open Bio.        |
| yFR762  | SHY278  | S288C      | MATα ade2::hisG his3Δ200 leu2Δ0 lys2Δ0 met15Δ0 trp1Δ63 ura3Δ0                                                                                                           | REF <sup>3</sup> |
| yFR763  | SHY508A | S288C      | MATα ade2::hisG his3Δ200 leu2Δ0 lys2Δ0 met15Δ0 trp1Δ63 ura3Δ0 kin28::kin28-as (L83G) [pSH579, CEN URA3 kin28-as (L83G)]                                                 | REF <sup>3</sup> |
| yFR999  |         | W303       | MATa ade2-1 trp1-1 can1-100 leu2-3,112 his3-11,15 ura3 srb10Δ::URA3                                                                                                     | REF <sup>4</sup> |
| yFR1321 | HHY168  | W303       | MATα ade2-1 trp1-1 can1-100 leu2-3,112 his3-11,15 ura3 tor1-1 fpr1::NAT RPL13A-2xFKBP12::TRP1                                                                           | Euroscarf        |
| yFR1324 | HHY170  | W303       | MATα ade2-1 trp1-1 can1-100 leu2-3,112 his3-11,15 ura3 tor1-1 fpr1::NAT RPL13A-2xFKBP12::TRP1 RPB1-FRB::kanMX6                                                          | Euroscarf        |
| yFR1325 | HHY178  | W303       | MATα ade2-1 trp1-1 can1-100 leu2-3,112 his3-11,15 ura3 tor1-1 fpr1::NAT RPL13A-2xFKBP12::TRP1 SRB5-FRB::kanMX6                                                          | Euroscarf        |
| yFR1499 |         | W303       | MATα ade2-1 trp1-1 can1-100 leu2-3,112 his3-11,15 ura3 tor1-1 fpr1::NAT RPL13A-2xFKBP12::TRP1 RPB1-FRB::kanMX6 [pFR482, CEN HIS3 RPB1-CTDwt-3FLAG]                      | This work        |
| yFR1501 |         | W303       | MATα ade2-1 trp1-1 can1-100 leu2-3,112 his3-11,15 ura3 tor1-1 fpr1::NAT RPL13A-2xFKBP12::TRP1 RPB1-FRB::kanMX6 [pFR486, CEN HIS3 RPB1-CTDS2A-3FLAG]                     | This work        |
| yFR1503 |         | W303       | MATα ade2-1 trp1-1 can1-100 leu2-3,112 his3-11,15 ura3 tor1-1 fpr1::NAT RPL13A-2xFKBP12::TRP1 RPB1-FRB::kanMX6 [pFR490, CEN HIS3 RPB1-CTDS5A-3FLAG]                     | This work        |
| yFR1526 |         | W303       | MATα ade2-1 trp1-1 can1-100 leu2-3,112 his3-11,15 ura3 tor1-1 fpr1::NAT RPL13A-2xFKBP12::TRP1 RPB1-FRB::kanMX6 [pFR494, CEN HIS3 RPB1-CTDS7A-3FLAG]                     | This work        |
| yFR1544 |         | W303       | MATα ade2-1 trp1-1 can1-100 leu2-3,112 his3-11,15 ura3 tor1-1 fpr1::NAT RPL13A-2xFKBP12::TRP1 SRB4-FRB::kanMX6                                                          | This work        |
| yFR1636 |         | S288C      | MATα ade2::hisG his3Δ200 leu2Δ0 lys2Δ0 met15Δ0 trp1Δ63 ura3Δ0 GAL11-9MYC::kITRP1                                                                                        | This work        |
| yFR1638 |         | S288C      | MATα ade2::hisG his3Δ200 leu2Δ0 lys2Δ0 met15Δ0 trp1Δ63 ura3Δ0 kin28::kin28-as (L83G) GAL11-9MYC::kITRP1 [pSH579, CEN URA3 kin28-as (L83G)]                              | This work        |
| yFR1640 |         | W303       | MATa ade2-1 trp1-1 can1-100 leu2-3,112 his3-11,15 ura3 srb10Δ::URA3 GAL11-9MYC::kITRP1                                                                                  | This work        |
| yFR1642 |         | W303       | MATα ade2-1 trp1-1 can1-100 leu2-3,112 his3-11,15 ura3 tor1-1 fpr1::NAT RPL13A-2xFKBP12::TRP1 RPB1-FRB::kanMX6 GAL11-18MYC::klURA3                                      | This work        |
| yFR1645 |         | W303       | MATα ade2-1 trp1-1 can1-100 leu2-3,112 his3-11,15 ura3 tor1-1 fpr1::NAT RPL13A-2xFKBP12::TRP1 RPB1-FRB::kanMX6 GAL11-18MYC::klURA3 [pFR482, CEN HIS3 RPB1-CTDwt-3FLAG]  | This work        |
| yFR1649 |         | W303       | MATα ade2-1 trp1-1 can1-100 leu2-3,112 his3-11,15 ura3 tor1-1 fpr1::NAT RPL13A-2xFKBP12::TRP1 RPB1-FRB::kanMX6 GAL11-18MYC::klURA3 [pFR490, CEN HIS3 RPB1-CTDS5A-3FLAG] | This work        |
| yFR1651 |         | W303       | MATα ade2-1 trp1-1 can1-100 leu2-3,112 his3-11,15 ura3 tor1-1 fpr1::NAT RPL13A-2xFKBP12::TRP1 RPB1-FRB::kanMX6 GAL11-18MYC::klURA3 [pFR494, CEN HIS3 RPB1-CTDS7A-3FLAG] | This work        |
| yFR1658 |         | S288C      | MATa his3Δ1 leu2Δ0 met15Δ0 ura3Δ0 GAL11-18MYC::klURA3                                                                                                                   | This work        |
| yFR1660 |         | S288C      | MATa his3Δ1 leu2Δ0 met15Δ0 ura3Δ0 ctk1Δ::kanMX4 GAL11-18MYC::klURA3                                                                                                     | This work        |
| yFR1662 |         | S288C      | MATa his3Δ1 leu2Δ0 met15Δ0 ura3D0 bur2Δ::kanMX4 GAL11-18MYC::klURA3                                                                                                     | This work        |

1. Ren, B. et al. Genome-wide location and function of DNA binding proteins. *Science (New York, N.Y.)* **290**, 2306-9 (2000).
2. Lemieux, K., Larochele, M. & Gaudreau, L. Variant histone H2A.Z, but not the HMG proteins Nhp6a/b, is essential for the recruitment of Swi/Snf, Mediator, and SAGA to the yeast GAL1 UAS(G). *Biochem Biophys Res Commun* **369**, 1103-7 (2008).
3. Liu, Y. et al. Two Cyclin-Dependent Kinases Promote RNA Polymerase II Transcription and Formation of the Scaffold Complex. *Molecular and Cellular Biology* **24**, 1721-1735 (2004).
4. Bataille, A.R. et al. A universal RNA polymerase II CTD cycle is orchestrated by complex interplays between kinase, phosphatase, and isomerase enzymes along genes. *Mol Cell* **45**, 158-70 (2012).
